# Supplementary material for: Predicting Resolvin D1 Pharmacokinetics in Humans with Physiologically‐Based Pharmacokinetic Modeling
Source: PubMed Central journal article supplement — Clin Transl Sci. 2020 Nov 30;14(2):683–91. doi: 10.1111/cts.12930 (PMC7993257; doi:10.1111/cts.12930), 2020-11-30
Supplement: CTS-14-683-s001.pdf [file CTS-14-683-s001.pdf]

Dataset S4: Pharmacokinetics of RvD1 in Sprague-Dawley rats.

**RvD1 concentrations with baseline values included**

| Time [h] | Concentration [pg/ml] |
|----------|-----------------------|
| 0        | 41.5225               |
| 1.1134   | 359.862               |
| 2.96907  | 344.291               |
| 5.93814  | 143.599               |
| 24.0309  | 117.647               |
| 36       | 34.6021               |

**RvD1 concentrations with baseline normalized and used in Figure 3B**

| Time [h] | Concentration [pg/ml] |
|----------|-----------------------|
| 0        |                       |
| 1.1134   | 318.4                 |
| 2.96907  | 302.77                |
| 5.93814  | 102.08                |
| 24.0309  | 76.12                 |
| 36       | -6.92                 |
