# Supplementary material for: Predicting Resolvin D1 Pharmacokinetics in Humans with Physiologically‐Based Pharmacokinetic Modeling
Source: PubMed Central journal article supplement — Clin Transl Sci. 2020 Nov 30;14(2):683–91. doi: 10.1111/cts.12930 (PMC7993257; doi:10.1111/cts.12930), 2020-11-30

Dataset S2: Submandibular gland pharmacokinetics to RvD1 in NOD/ShiLtJ mice with SS-like features.

| Time [h] | Concentration [pg/ml] | SD [pg/ml] |
|----------|-----------------------|------------|
| 0        | 0                     | 0          |
| 0.083333 | 2714.41               | 233.601    |
| 0.25     | 242.75                | 43.062     |
| 0.5      | 53.68                 | 13.987     |
| 1        | 4.01                  | 14.309     |
| 2        | 43.88                 | 51.881     |
| 4        | 32.08                 | 28.353     |

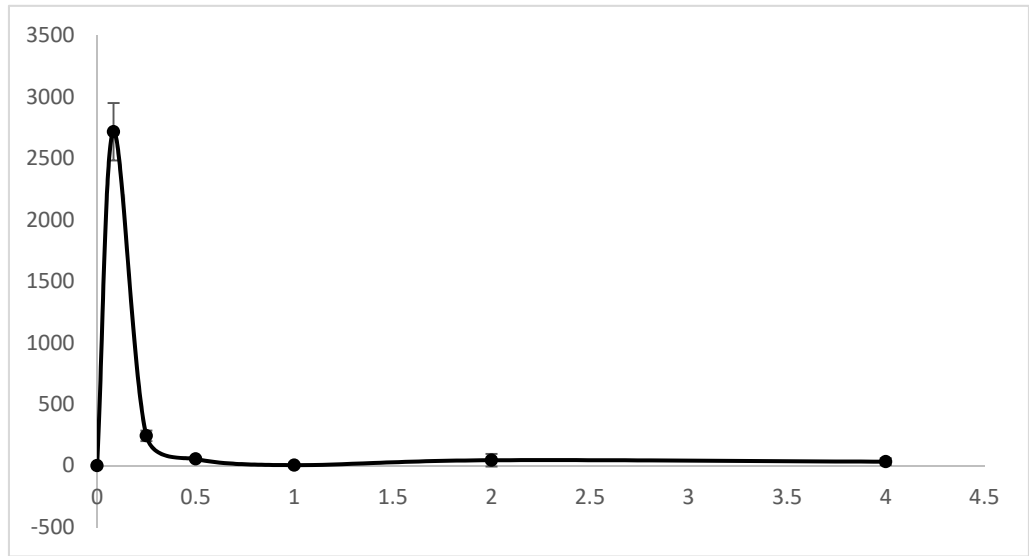

Supplement: CTS-14-683-s002.pdf [file CTS-14-683-s002.pdf]
