# Supplementary material for: Predicting Resolvin D1 Pharmacokinetics in Humans with Physiologically‐Based Pharmacokinetic Modeling
Source: PubMed Central journal article supplement — Clin Transl Sci. 2020 Nov 30;14(2):683–91. doi: 10.1111/cts.12930 (PMC7993257; doi:10.1111/cts.12930), 2020-11-30

Figure S1: RvD1 concentrations in plasma (A) and submandibular glands (B) following intravenous bolus administration at 0.1 mg/kg dose (n=5) in NOD/ShiLtJ mice with SS plasma. The PK parameters inside the boxes of each figure were calculated by noncompartmental analysis. Diamond, square, and triangle symbols represent data from each individual animal of the observed data.

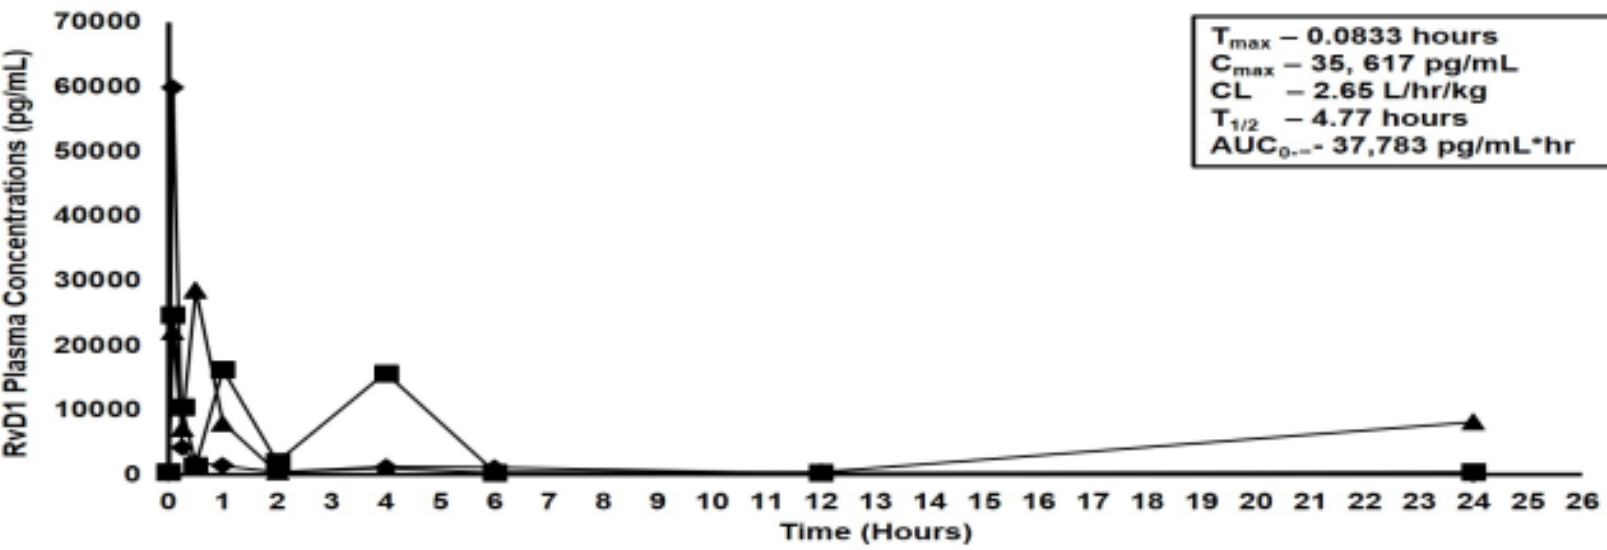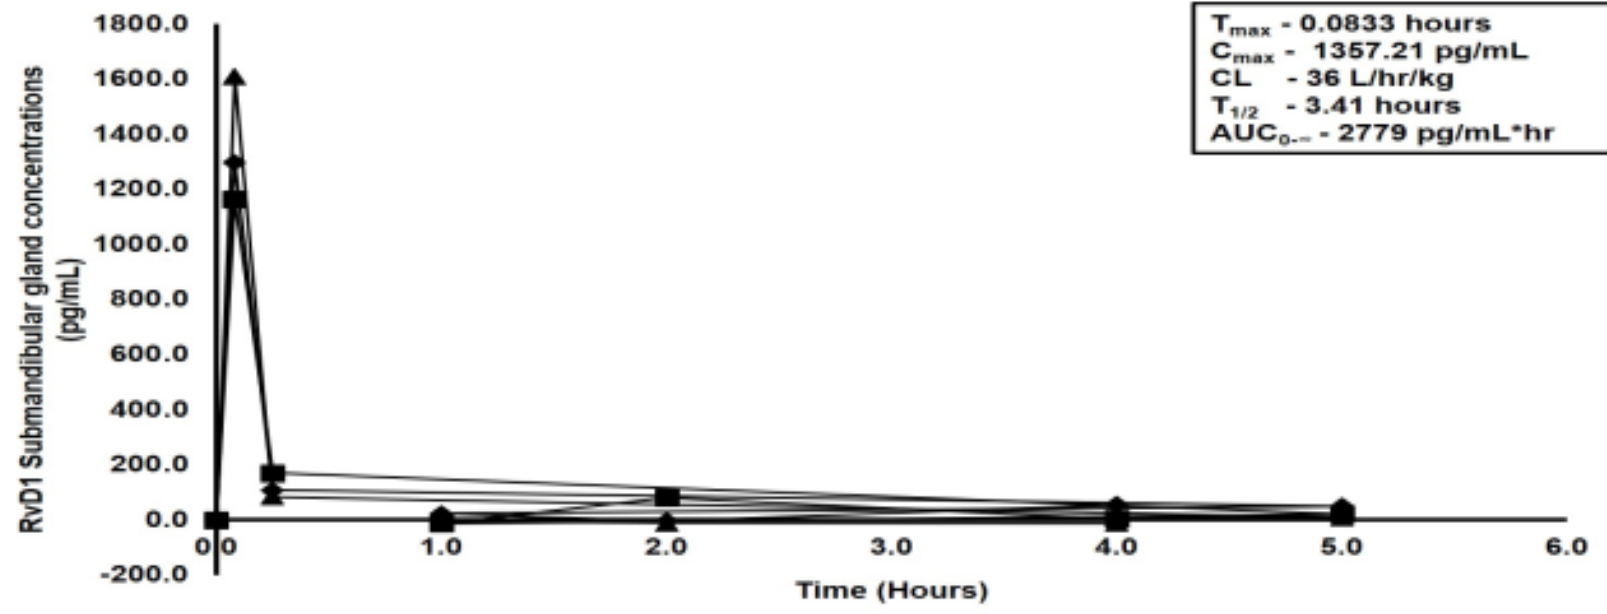

Supplement: CTS-14-683-s005.pdf [file CTS-14-683-s005.pdf]
