# Supplementary material for: Predicting Resolvin D1 Pharmacokinetics in Humans with Physiologically‐Based Pharmacokinetic Modeling
Source: PubMed Central journal article supplement — Clin Transl Sci. 2020 Nov 30;14(2):683–91. doi: 10.1111/cts.12930 (PMC7993257; doi:10.1111/cts.12930), 2020-11-30
Supplement: CTS-14-683-s006.pdf [file CTS-14-683-s006.pdf]

Dataset S3: Pharmacokinetics of RvD1 in C57BL/6N mice.

| Time [h] | Concentration [pg/mL] | SD [pg/mL] |
|----------|-----------------------|------------|
| 0        | 0                     | 58.22      |
| 0.93     | 500.84                | 360.96     |
| 2.9      | 682.3542              | 296.91     |
| 5.9      | 194.95925             | 285.27     |
| 24       | 13.44663              | 34.93      |
